# Supplementary material
Source: publisher figshare collection journal article supplement (https://gsapubs.figshare.com/ndownloader/files/22759877)
Supplement: Supplementary file 1 [file 22759877]

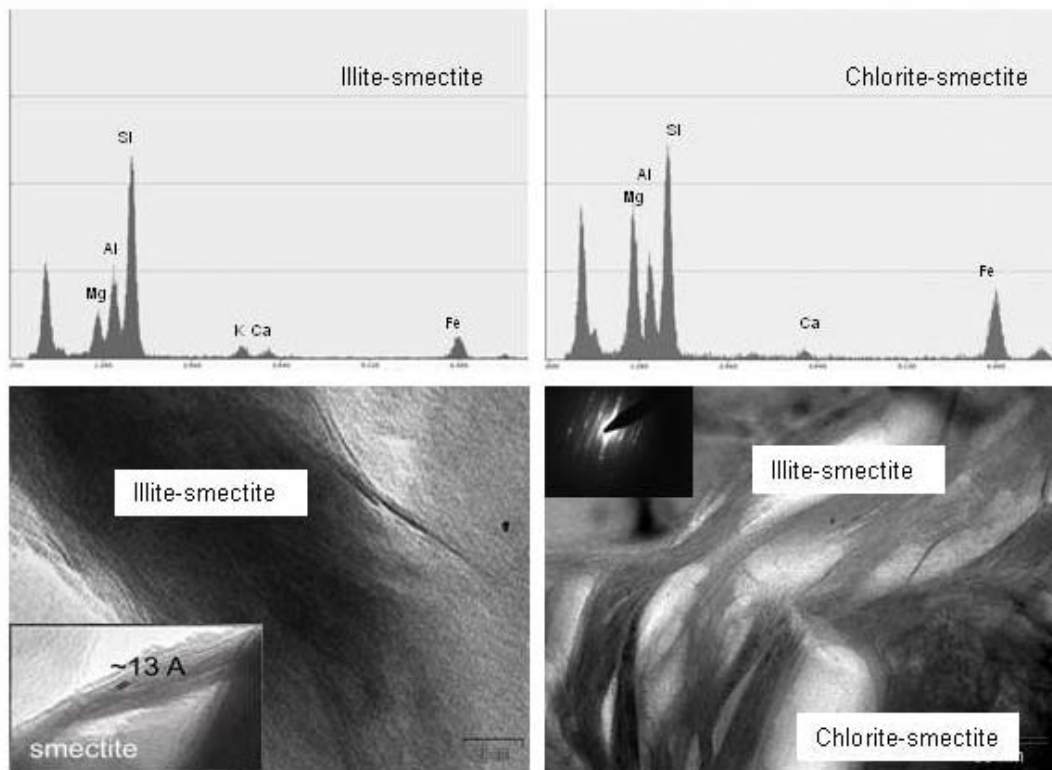

TEM lattice fringe images show I-S and C-S particles and their chemical composition.

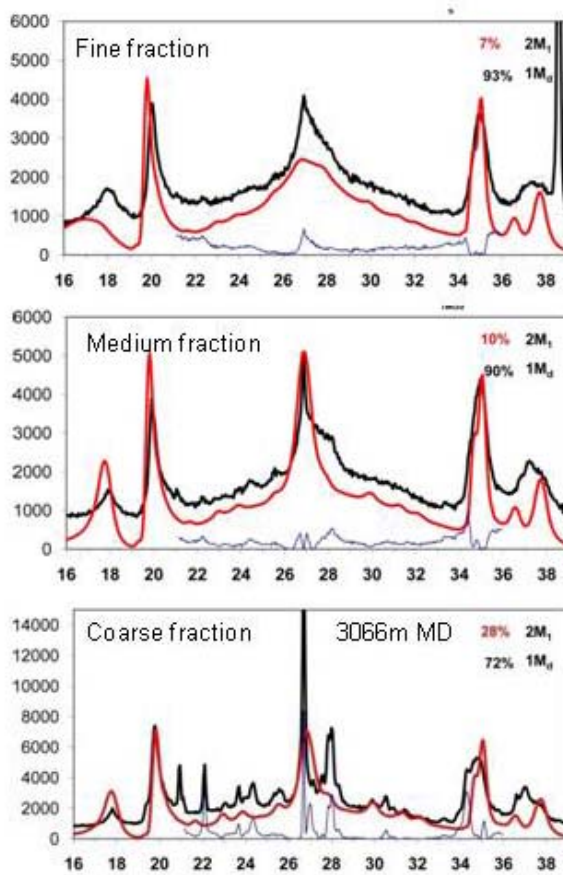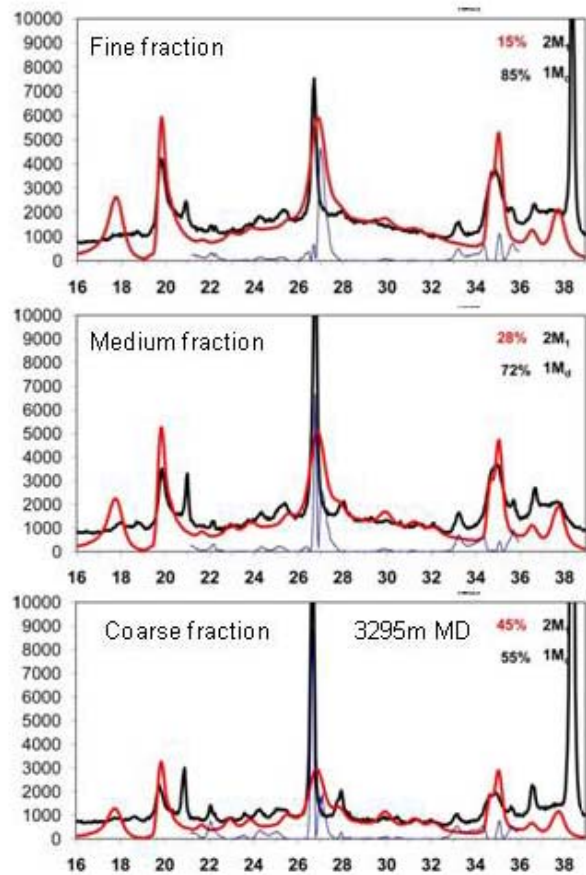

Best matches of calculated WILDFIRE patterns with the different grain size fractions of the natural SAFOD samples.

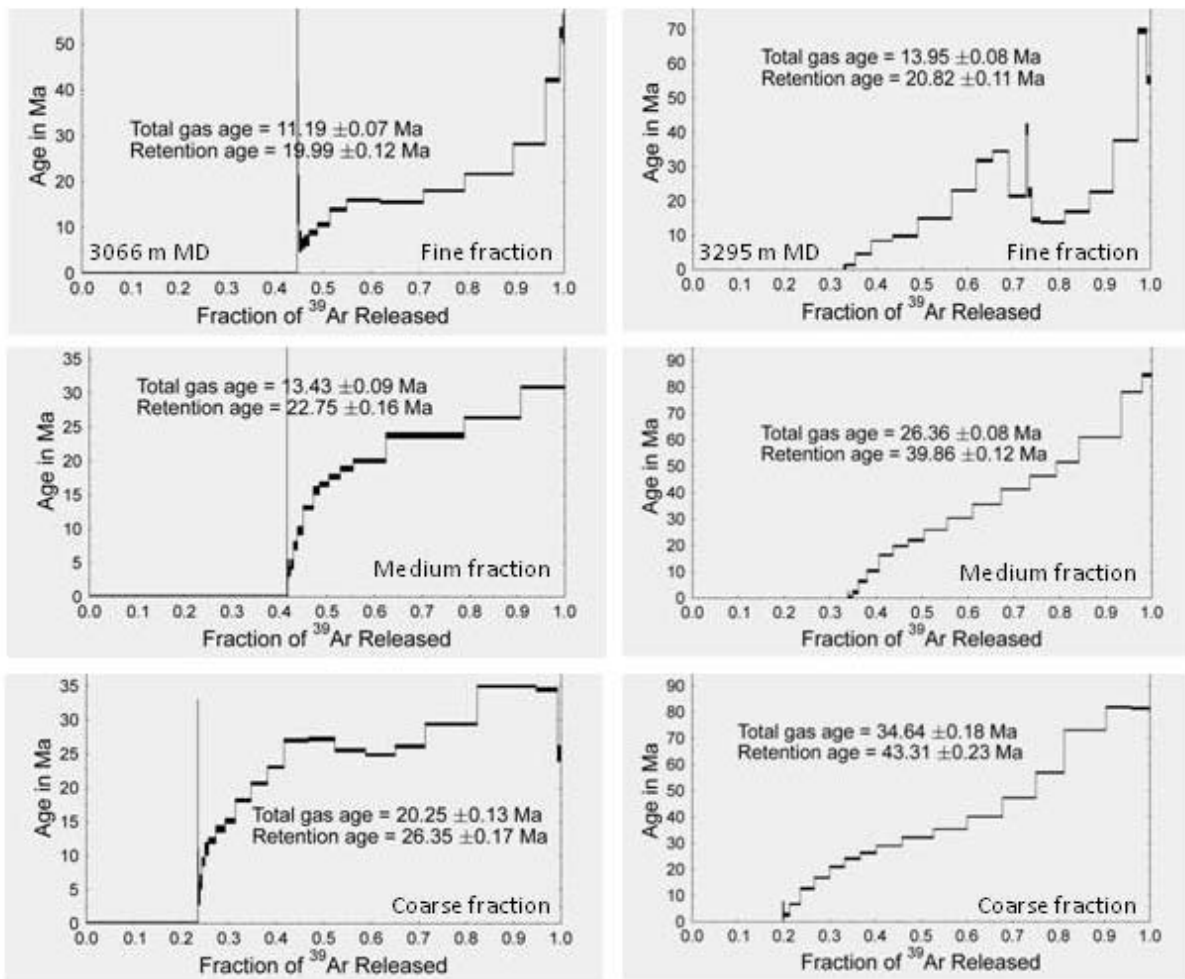

$^{40}\text{Ar}/^{39}\text{Ar}$  spectra for the different grain size fractions of fault rocks from the SAFOD drillhole at 3066 m and 3296 m MD.

Table containing depth, grain-sizes, %1M and 2M illite, total gas age and retention age data of the two sample-sets investigated.

| depth | grain size        | % 1M   | % 2M1  | TGA              | RA               |
|-------|-------------------|--------|--------|------------------|------------------|
| (m)   | ( $\mu\text{m}$ ) | illite | illite | (Ma)             | (Ma)             |
| 3066  | < 0.2             | 93     | 7      | $11.19 \pm 0.07$ | $19.99 \pm 0.12$ |
|       | 0.2-0.4           | 90     | 10     | $13.00 \pm 0.05$ | $20.99 \pm 0.08$ |
|       | 0.4-1             | 83     | 17     | $13.43 \pm 0.09$ | $22.75 \pm 0.16$ |
|       | 1-2               | 72     | 28     | $20.25 \pm 0.13$ | $26.35 \pm 0.17$ |
| 3296  | < 0.1             | 85     | 15     | $13.95 \pm 0.08$ | $20.82 \pm 0.11$ |
|       | 0.1-0.75          | 72     | 28     | $26.36 \pm 0.08$ | $39.86 \pm 0.12$ |
|       | 0.75-1.0          | 55     | 45     | $34.64 \pm 0.18$ | $43.31 \pm 0.23$ |
